# Supplementary material for: Protocol for a scoping review to support development of a CONSORT extension for randomised controlled trials using cohorts and routinely collected health data
Source: PubMed Central journal article supplement — BMJ Open. 2018 Aug 5;8(8):e025266. doi: 10.1136/bmjopen-2018-025266 (PMC6078273; doi:10.1136/bmjopen-2018-025266), 2018-08-05
Supplement: bmjopen-2018-025266.reviewer_comments.pdf [file bmjopen-2018-025266.reviewer_comments.pdf]

## PEER REVIEW HISTORY

BMJ Open publishes all reviews undertaken for accepted manuscripts. Reviewers are asked to complete a checklist review form (<http://bmjopen.bmj.com/site/about/resources/checklist.pdf>) and are provided with free text boxes to elaborate on their assessment. These free text comments are reproduced below.

## ARTICLE DETAILS

|                            |                                                                                                                                                                                                                                                                                                                                                                                                                          |
|----------------------------|--------------------------------------------------------------------------------------------------------------------------------------------------------------------------------------------------------------------------------------------------------------------------------------------------------------------------------------------------------------------------------------------------------------------------|
| <b>TITLE (PROVISIONAL)</b> | Protocol for a Scoping Review to Support Development of a CONSORT Extension for Randomized Controlled Trials Using Cohorts and Routinely Collected Health Data                                                                                                                                                                                                                                                           |
| <b>AUTHORS</b>             | Kwakkenbos, Linda; Imran, Mahrukh; Mc Cord, Kimberly; Sampson, Margaret; Fröbert, O; Gale, Chris; Hemkens, Lars; Langan, Sinead; Moher, David; Relton, Clare; Zwarenstein, Merrick; Benchimol, Eric; Boutron, Isabelle; Campbell, Marion; Erlinge, David; Jawad, Sena; Ravaud, Philippe; Rice, Danielle; Sauve, Maureen; van Staa, Tjeerd; Thabane, Lehana; Uher, Rudolf; Verkooijen, Helena; Juszcak, Ed; Thombs, Brett |

This article was not externally reviewed at BMJ Open. Protocols that have been independently assessed prior to submission to BMJ Open are usually fast-tracked to publication on the grounds that further substantial changes will not be possible. This independent assessment will usually be external, independent review for both a substantial grant award from a non-commercial or government funder and ethics approval.
