# Supplementary material for: Protocol for a scoping review to support development of a CONSORT extension for randomised controlled trials using cohorts and routinely collected health data
Source: PubMed Central journal article supplement — BMJ Open. 2018 Aug 5;8(8):e025266. doi: 10.1136/bmjopen-2018-025266 (PMC6078273; doi:10.1136/bmjopen-2018-025266), 2018-08-05

### Supplementary File 3

#### Draft Flow Diagram of Study Selection Process - Cohorts

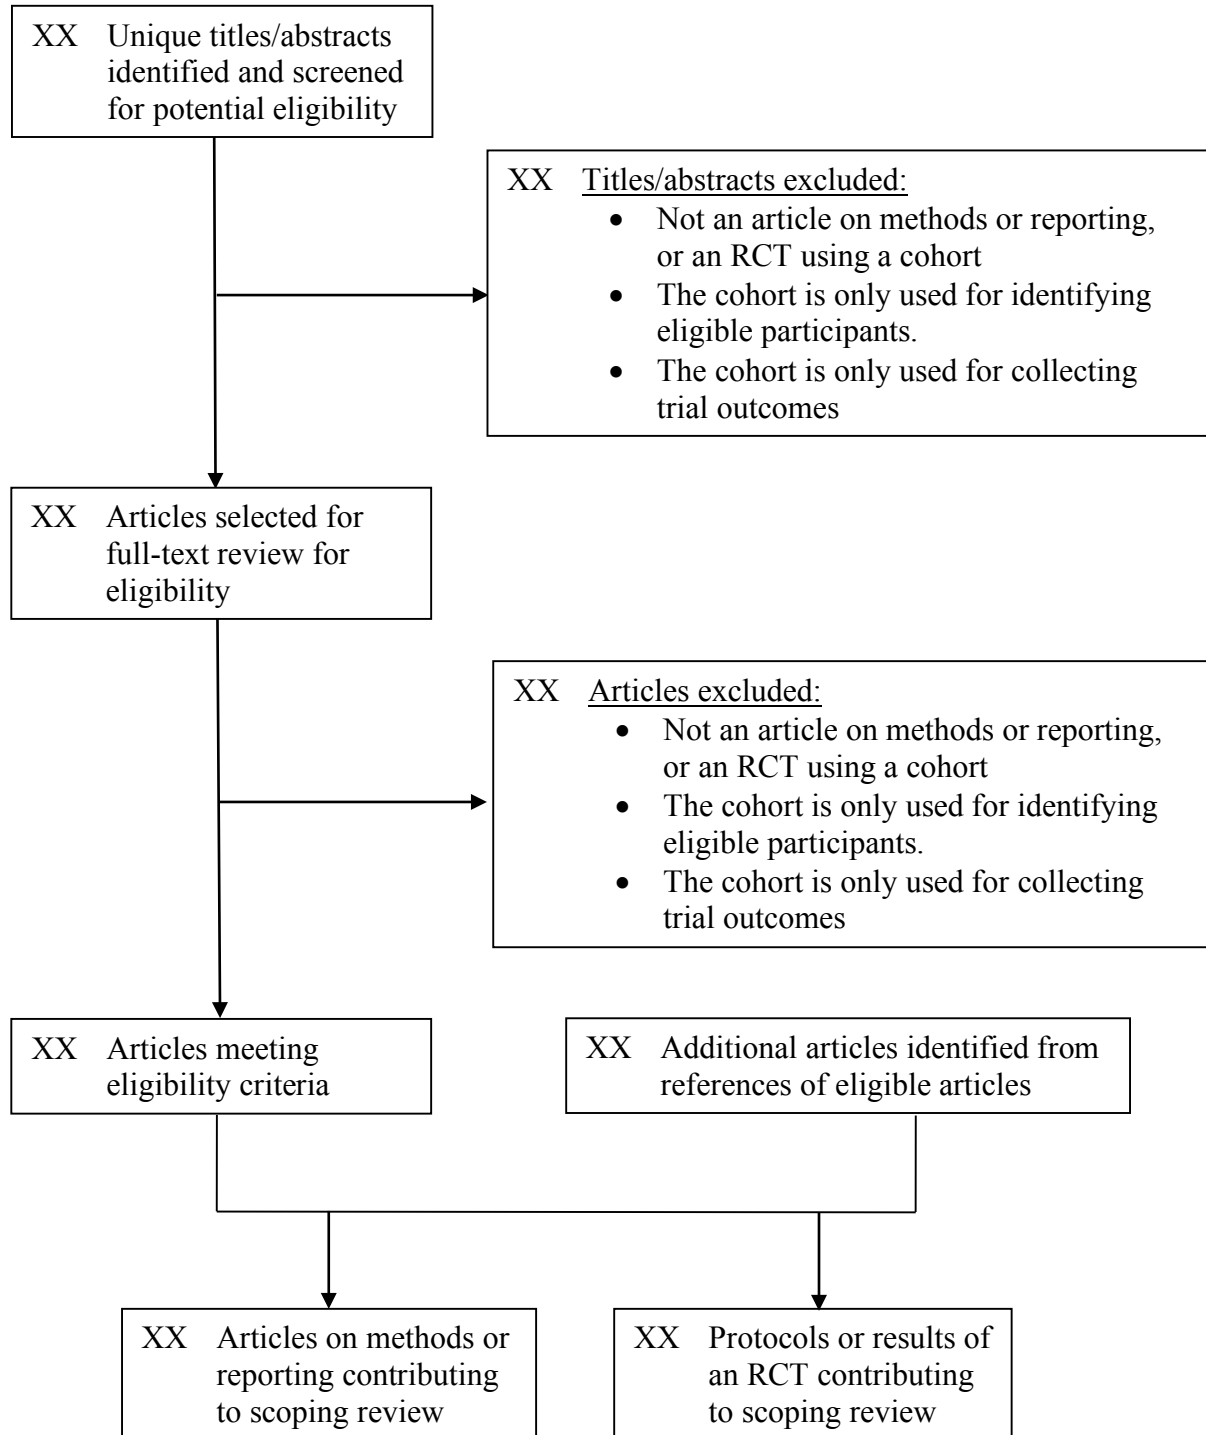

## Draft Flow Diagram of Study Selection Process - Registries

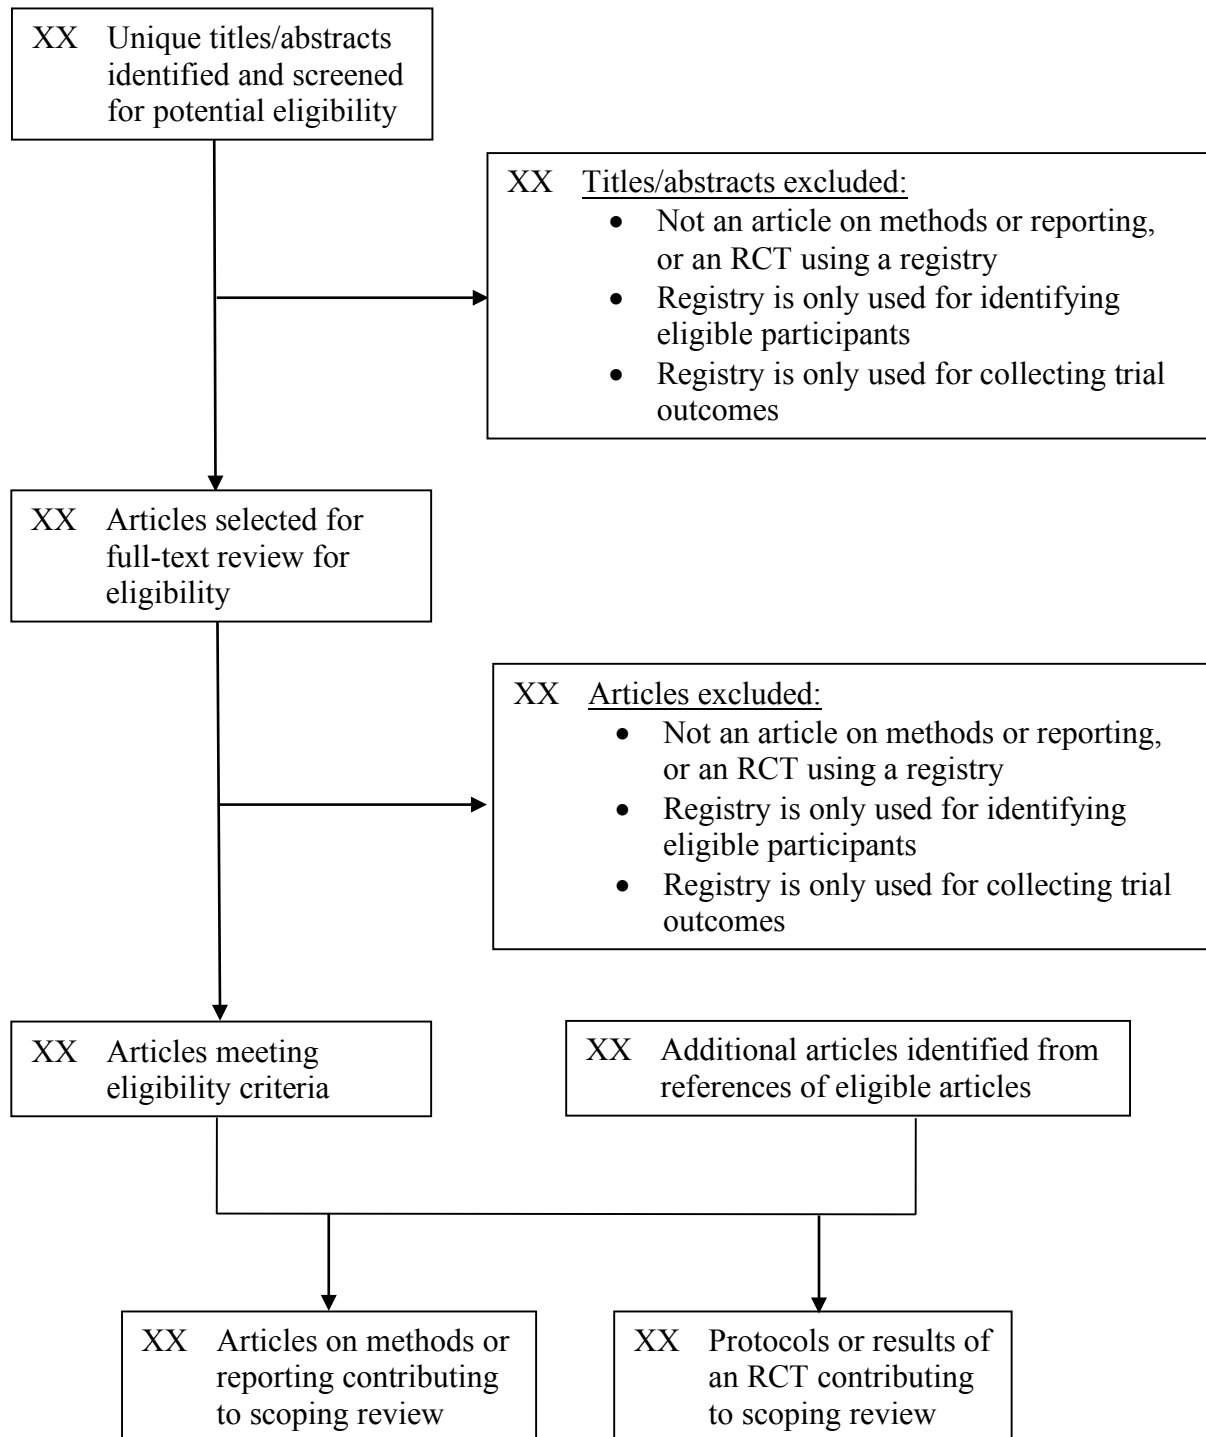

## Draft Flow Diagram of Study Selection Process – Administrative data

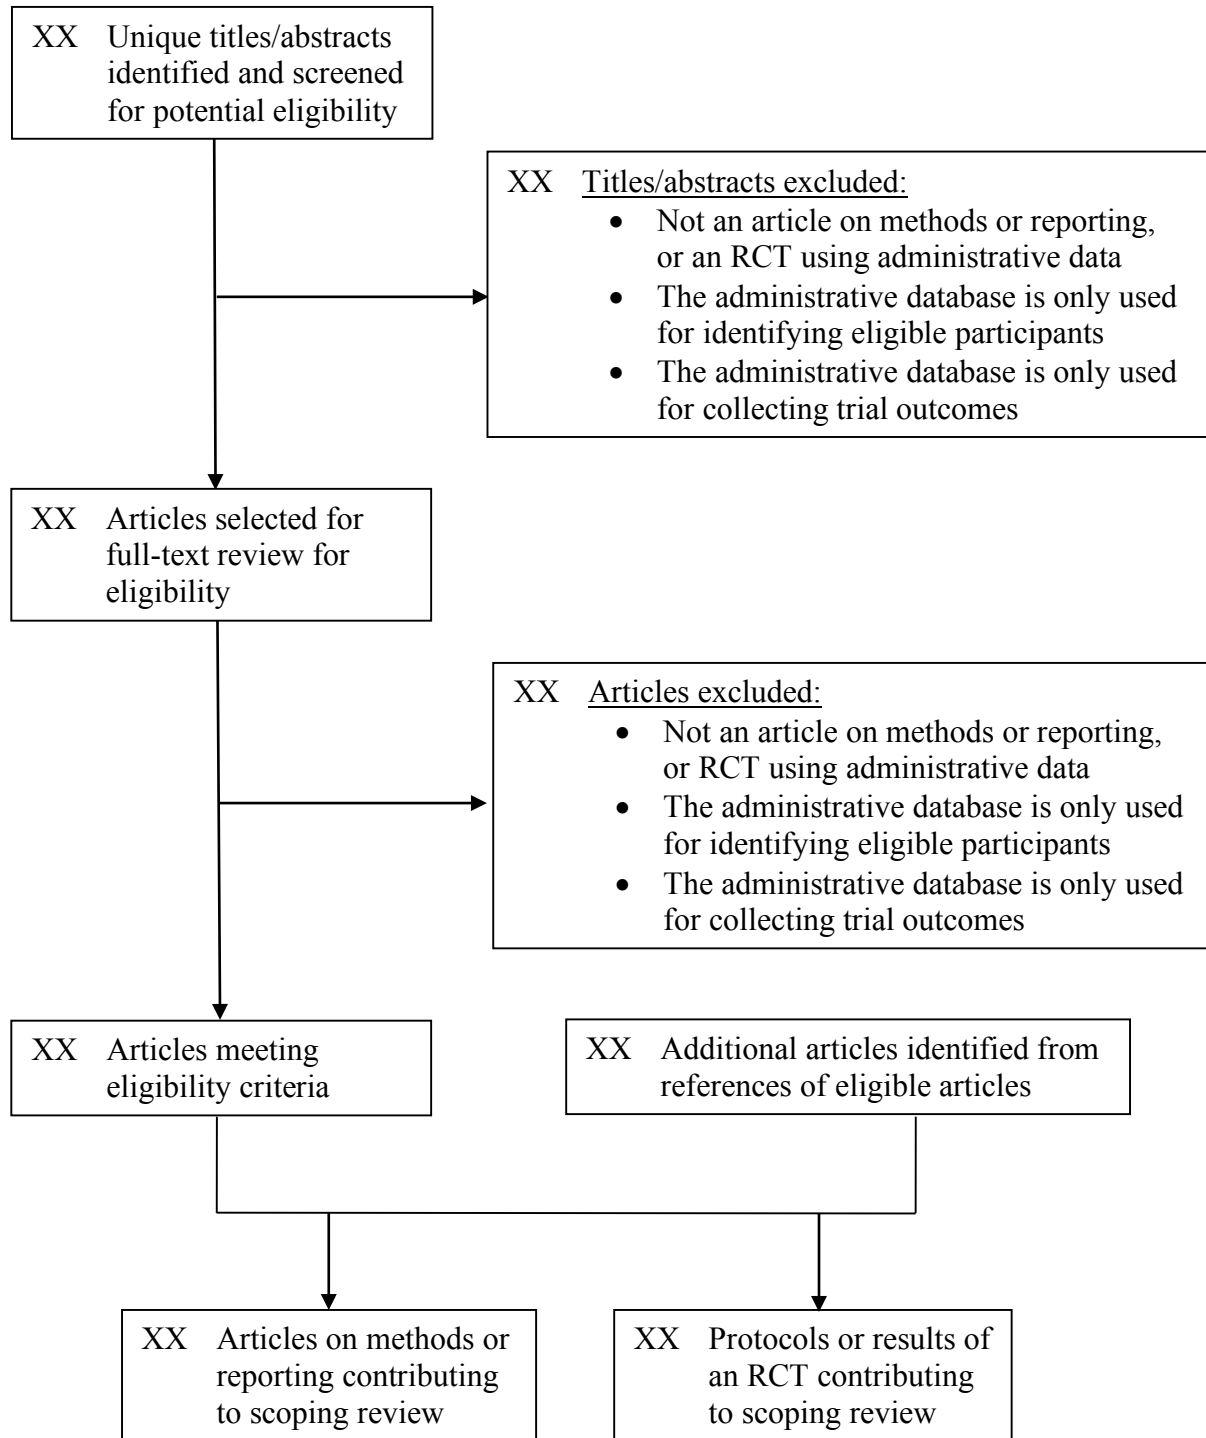

## Draft Flow Diagram of Study Selection Process – Electronic Health Records (EHRs)

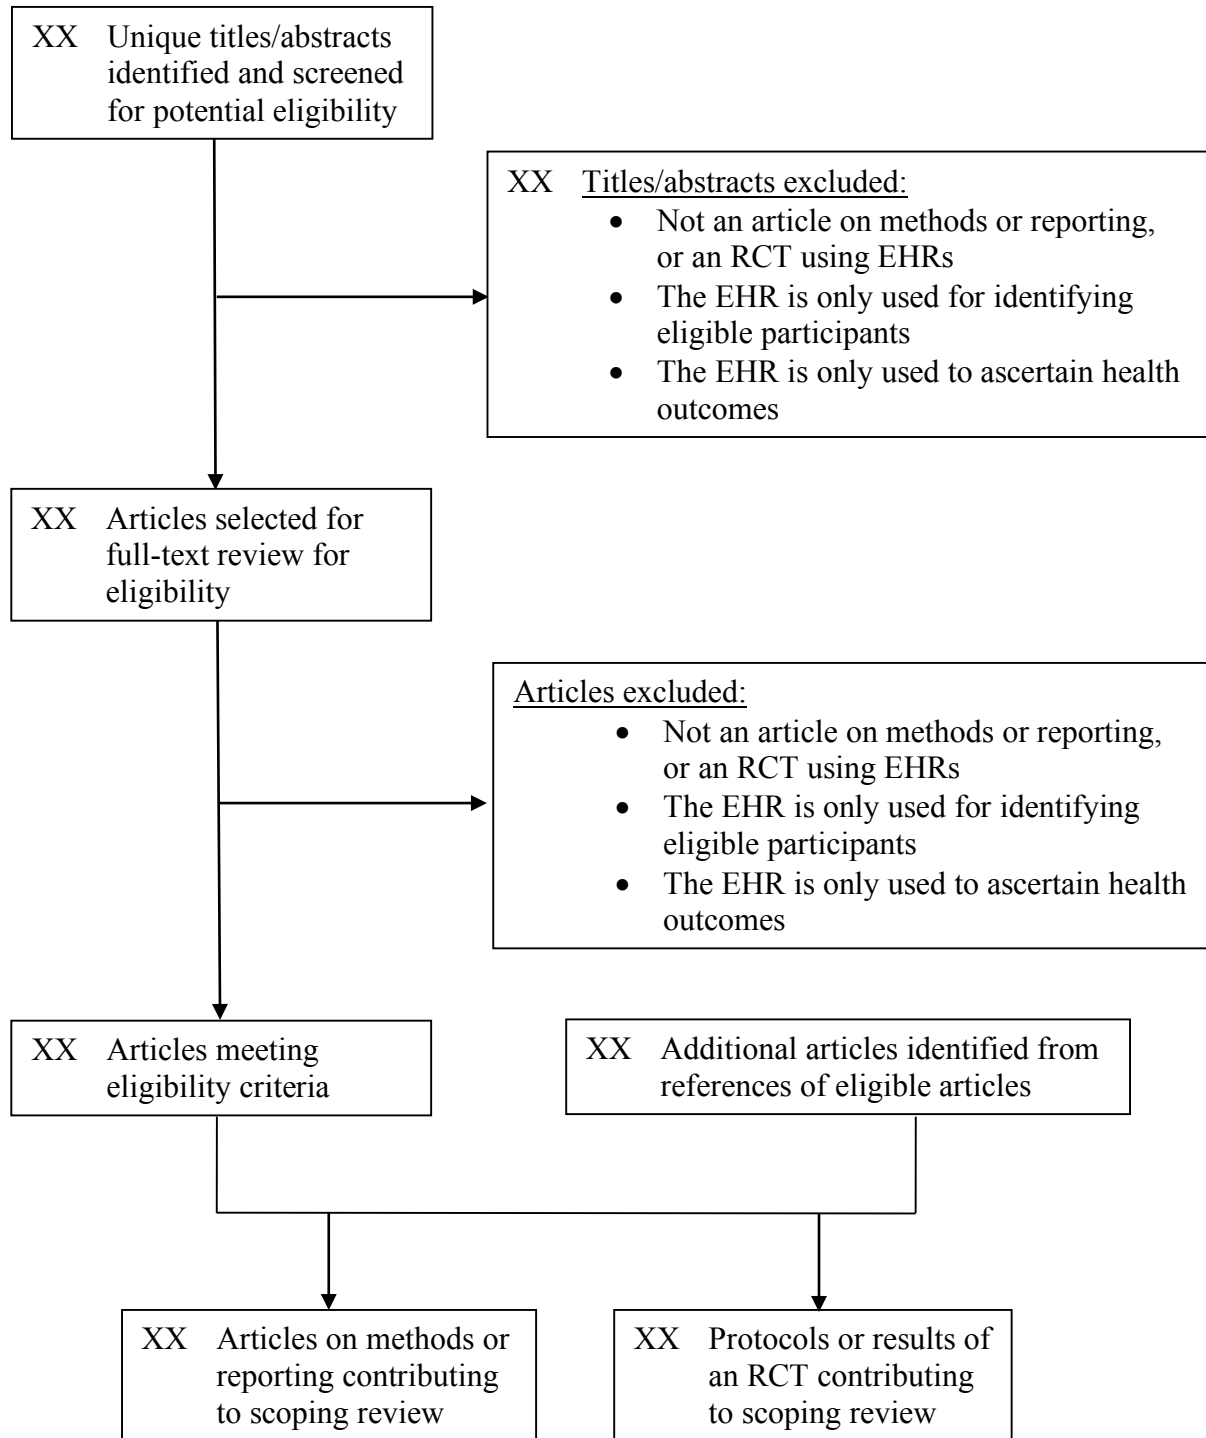

Supplement: bmjopen-2018-025266supp003.pdf [file bmjopen-2018-025266supp003.pdf]
